# Supplementary material for: Tailoring of the core structure towards promising small molecule hole-transporting materials for perovskite solar cells: a theoretical study
Source: Royal Society of Chemistry journal article supplement (doi:10.1039/d0cp02643c), 2020-01-01
Supplement: d0cp02643c1.pdf [file d0cp02643c1.pdf]

Supplementary data for

Tailoring of the core structure towards promising small molecule  
hole-transporting materials for perovskite solar cells: a theoretical  
study

Zhu-Zhu Sun<sup>a,\*</sup>, Wei-Lu Ding<sup>b</sup>, Shuai Feng<sup>c</sup>, Xing-Liang Peng<sup>d</sup>

*<sup>a</sup>Energy-Saving Building Materials Innovative Collaboration Center of Henan Province, Xinyang Normal University, Xinyang 464000, China*

*<sup>b</sup>Beijing Key Laboratory of Ionic Liquids Clean Process, CAS Key Laboratory of Green Process and Engineering, State Key Laboratory of Multiphase Complex Systems, Institute of Process Engineering, Chinese Academy of Sciences, Beijing 100190, China*

*<sup>c</sup>College of Chemistry and Chemical Engineering, Taishan University, Taian 271021, China*

*<sup>d</sup>MOE Key Laboratory of Organic OptoElectronics and Molecular Engineering, Department of Chemistry, Tsinghua University, Beijing 100084, China*

*E-mail: Z.Z.Sun: zhuzhusun@xynu.edu.cn*

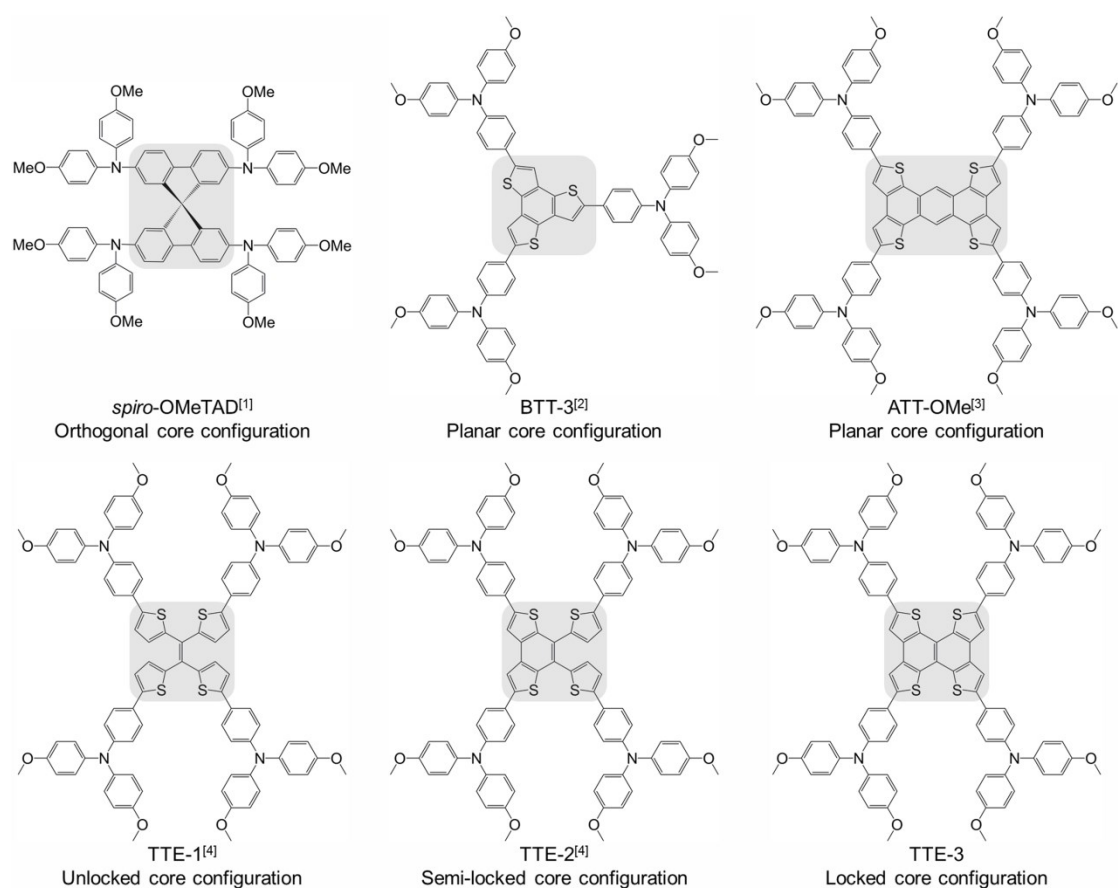

**Fig. S1** The sample molecules are used to explain the terms of "orthogonal", "planar", "core structure", "unlocked", "semi-locked" and "locked", where the core structures are shown in the shaded areas. The references are listed as below.

- [1] L. Calio, S. Kazim, M. Grätzel and S. Ahmad, *Angew. Chem. Int. Ed.*, 2016, **55**, 14522-14545.
- [2] A. Molina-Ontoria, I. Zimmermann, I. Garcia-Benito, P. Gratia, C. Roldan-Carmona, S. Aghazada, M. Grätzel, M. K. Nazeeruddin, and N. Martin, *Angew. Chem. Int. Ed.*, 2016, **55**, 6270-6274
- [3] I. Zimmermann, J. Urieta-Mora, P. Gratia, J. Arago, G. Grancini, A. Molina-Ontoria, E. Orti, N. Martin and M. K. Nazeeruddin, *Adv. Energ. Mater.*, 2017, **7**, 1601674.
- [4] C. Shen, Y. Wu, H. Zhang, E. Li, W. Zhang, X. Xu, W. Wu, H. Tian and W.H. Zhu, *Angew. Chem. Int. Ed.*, 2019, **58**, 3784-3789.

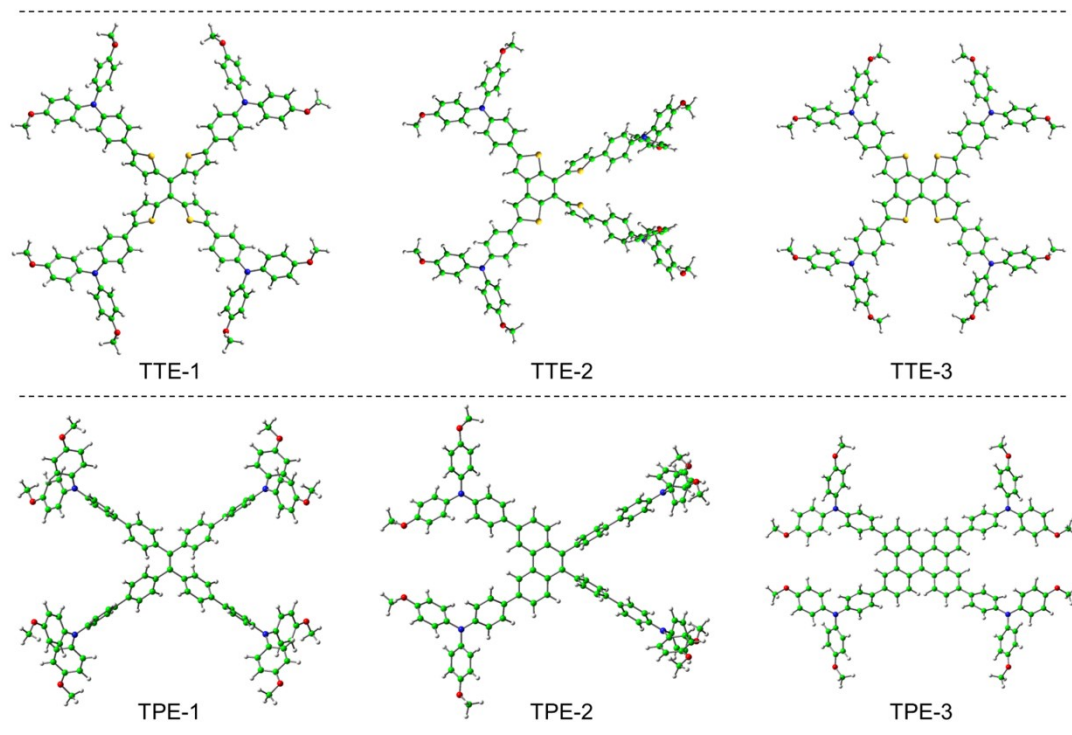

**Fig. S2** Optimized molecular geometries of the investigated systems.

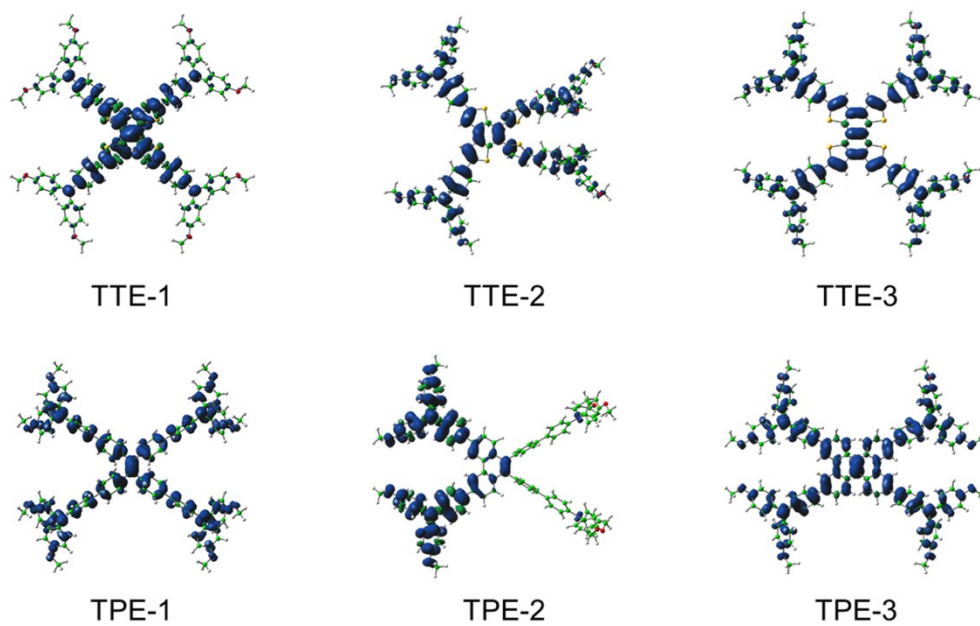

**Fig. S3** Calculated electron spin density maps of the cationic state HTMs.

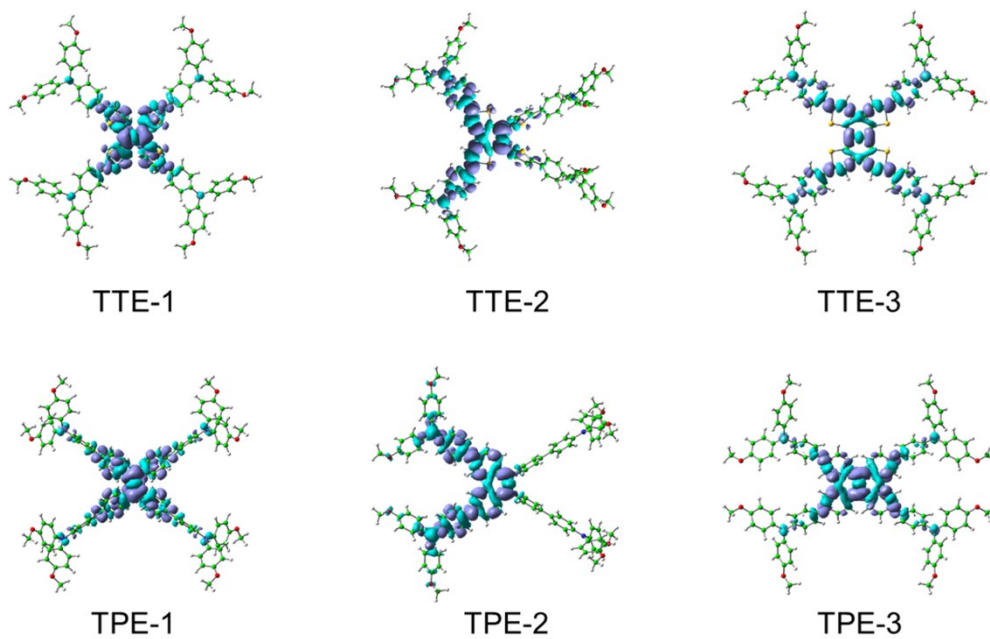

**Fig. S4** Charge density difference maps of the investigated HTMs, the purple and the blue represent where the electrons are increased and reduced, respectively.

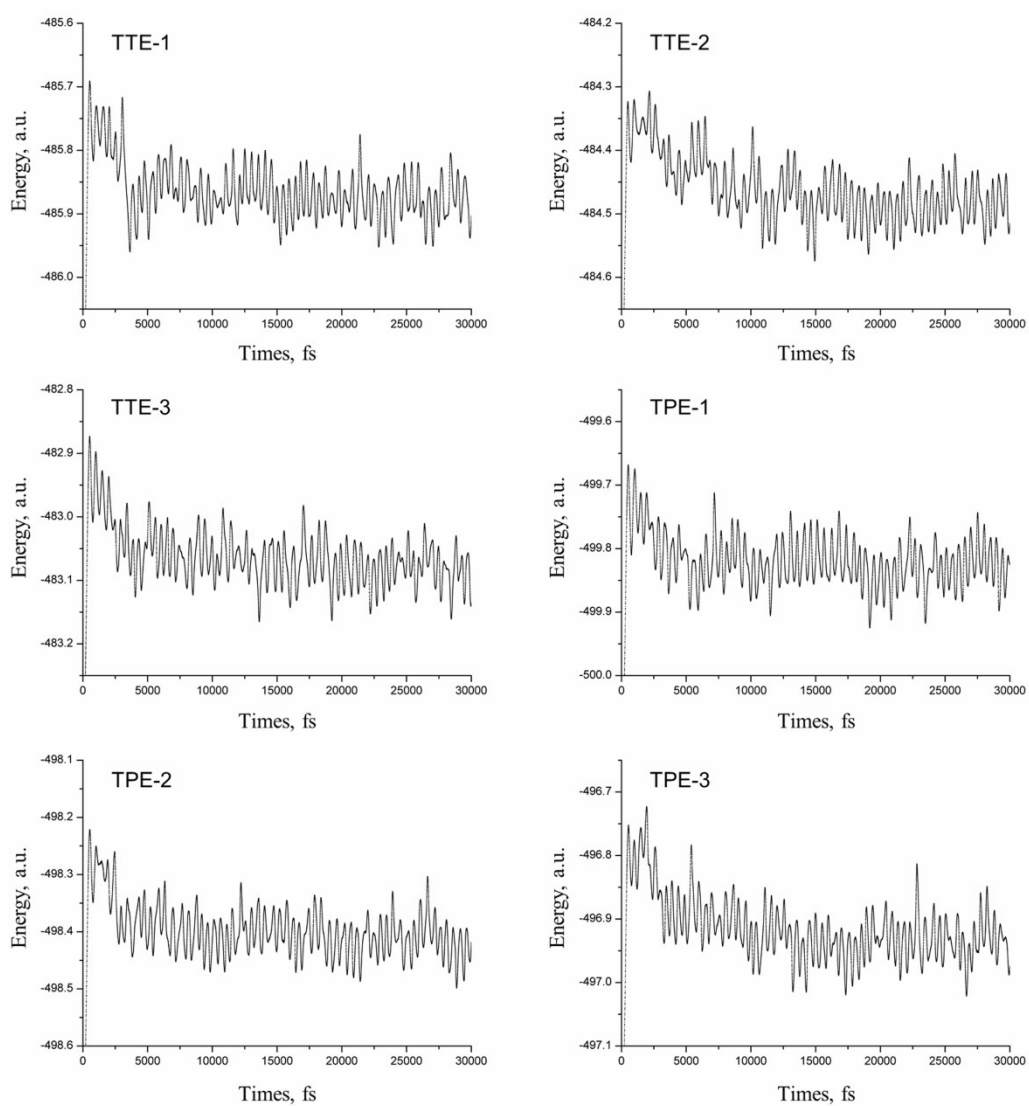

**Fig. S5** Total electronic energy evolution of the investigated systems as a function of simulation time.
